# Supplementary material
Source: MDPI journal article supplement (https://www.mdpi.com/2072-4292/14/13/3137)
Supplement: s1 [file s1]

# Downscaling Satellite Soil Moisture using a Modular Spatial Inference Framework

Ricardo M. Llamas, Leobardo Valera, Paula Olaya, Michela Taufer and Rodrigo Vargas

## Supplementary Material S2

### Number of North American Soil Moisture Database available stations in 2010 over the two regions of interest

The maximum number of NASMD stations available per month in the West region ranged from 28 to 39, while they ranged from 114 to 116 in the Midwest region. Similar numbers of stations were available regarding weekly periods, ranging from 26 to 39 in the West region, and 110 to 116 in the Midwest region.

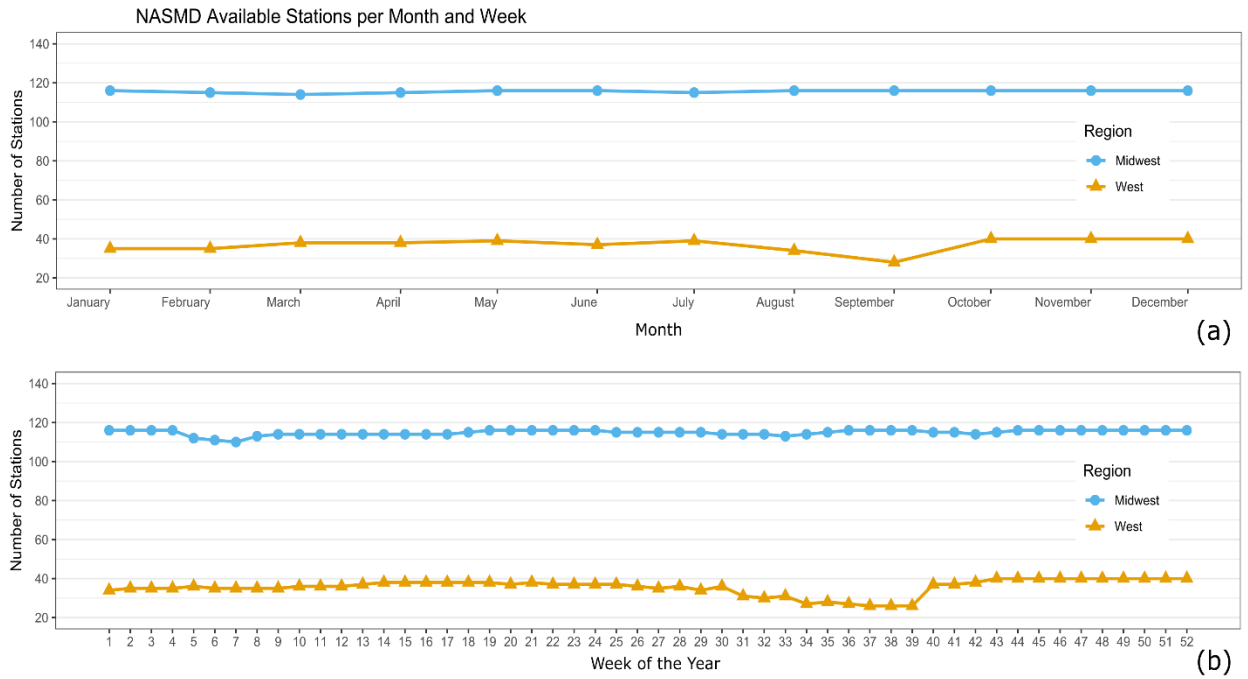

### Output parameters in model generation process for the four proposed machine learning methods

#### 1. KNN model generation outputs for monthly layers in 2010 over the Midwest region of interest

The **Layer** column shows the month of the year. The **No.Points** column shows the number of points used as training data in the entire sampling space in every month, this number corresponds with the 70% of the available sample points that were defined for training the model. The **kmax** column shows the maximum threshold of k-neighbors allowed to generate each model. The **Ktuned** column shows the optimal number of k-neighbors in each model derived from the highest correlation and lower rmse obtained from a 10-fold

cross validation process. The **Kernel** column shows the optimal kernel function obtained from a 10-fold cross validation process. The **rmse** and **Cor** columns show the best results of the root minimum square error and the correlation respectively, derived from a 10-fold cross validation process.

|    | Layer   | No.Points | kmax | Ktunned | Kernel      | rmse     | Cor      |
|----|---------|-----------|------|---------|-------------|----------|----------|
| 1  | 2010_01 | 312       | 50   | 16      | optimal     | 0.033384 | 0.842153 |
| 2  | 2010_02 | 314       | 50   | 22      | triangular  | 0.034365 | 0.754509 |
| 3  | 2010_03 | 314       | 50   | 21      | gaussian    | 0.03449  | 0.789885 |
| 4  | 2010_04 | 314       | 50   | 14      | triangular  | 0.030992 | 0.818085 |
| 5  | 2010_05 | 314       | 50   | 17      | triangular  | 0.032319 | 0.763043 |
| 6  | 2010_06 | 314       | 50   | 10      | gaussian    | 0.032614 | 0.744214 |
| 7  | 2010_07 | 314       | 50   | 22      | triangular  | 0.034059 | 0.619679 |
| 8  | 2010_08 | 314       | 50   | 14      | gaussian    | 0.030717 | 0.589444 |
| 9  | 2010_09 | 314       | 50   | 16      | optimal     | 0.031479 | 0.766476 |
| 10 | 2010_10 | 314       | 50   | 10      | rectangular | 0.029734 | 0.65627  |
| 11 | 2010_11 | 314       | 50   | 13      | gaussian    | 0.033273 | 0.70344  |
| 12 | 2010_12 | 313       | 50   | 11      | gaussian    | 0.03322  | 0.751877 |

## 2. KNN model generation outputs for monthly layers in 2010 over the West region of interest.

The **Layer** column shows the month of the year. The **No.Points** column shows the number of points used as training data in the entire sampling space in every month, this number corresponds with the 70% of the available sample points that were defined for training the model. The **kmax** column shows the maximum threshold of k-neighbors allowed to generate each model. The **Ktunned** column shows the optimal number of k-neighbors in each model derived from the highest correlation and lower RMSE obtained from a 10-fold cross validation process. The **Kernel** column shows the optimal kernel function obtained from a 10-fold cross validation process. The **rmse** and **Cor** columns show the best results of the root minimum square error and the correlation respectively, derived from a 10-fold cross validation process.

|    | Layer   | No.Points | kmax | Ktunned | Kernel       | rmse        | Cor         |
|----|---------|-----------|------|---------|--------------|-------------|-------------|
| 1  | 2010_01 | 147       | 50   | 9       | epanechnikov | 0.042735184 | 0.463605999 |
| 2  | 2010_02 | 170       | 50   | 12      | optimal      | 0.042436006 | 0.470224521 |
| 3  | 2010_03 | 165       | 50   | 17      | triangular   | 0.037342116 | 0.595236665 |
| 4  | 2010_04 | 254       | 50   | 9       | gaussian     | 0.041393036 | 0.568183368 |
| 5  | 2010_05 | 279       | 50   | 17      | gaussian     | 0.033858341 | 0.5571332   |
| 6  | 2010_06 | 306       | 50   | 18      | epanechnikov | 0.02704039  | 0.529970108 |
| 7  | 2010_07 | 301       | 50   | 12      | gaussian     | 0.024741897 | 0.636102857 |
| 8  | 2010_08 | 299       | 50   | 25      | gaussian     | 0.026257011 | 0.524157052 |
| 9  | 2010_09 | 275       | 50   | 19      | optimal      | 0.024934333 | 0.491592833 |
| 10 | 2010_10 | 311       | 50   | 8       | triangular   | 0.027085603 | 0.675251402 |
| 11 | 2010_11 | 307       | 50   | 15      | epanechnikov | 0.032414744 | 0.617932416 |
| 12 | 2010_12 | 249       | 50   | 9       | gaussian     | 0.045342981 | 0.419021076 |

### 3. KNN model generation outputs for weekly layers in 2010 over the Midwest region of interest.

The **Layer** column shows the week of the year based on the first Julian day of each given week. The **No.Points** column shows the number of points used as training data in the entire sampling space in every week, this number corresponds with the 70% of the available sample points that were defined for training the model. The **kmax** column shows the maximum threshold of k-neighbors allowed to generate each model. The **Ktunned** column shows the optimal number of k-neighbors in each model derived from the highest correlation and lower RMSE obtained from a 10-fold cross validation process. The **Kernel** column shows the optimal kernel function obtained from a 10-fold cross validation process. The **rmse** and **Cor** columns show the best results of the root minimum square error and the correlation respectively, derived from a 10-fold cross validation process.

|    | Layer    | No.Points | kmax | Ktunned | Kernel     | rmse     | Cor      |
|----|----------|-----------|------|---------|------------|----------|----------|
| 1  | 2010_001 | 259       | 50   | 15      | gaussian   | 0.039293 | 0.756716 |
| 2  | 2010_008 | 269       | 50   | 9       | gaussian   | 0.036164 | 0.777565 |
| 3  | 2010_015 | 309       | 50   | 14      | triangular | 0.034217 | 0.85282  |
| 4  | 2010_022 | 308       | 50   | 18      | optimal    | 0.036187 | 0.820978 |
| 5  | 2010_029 | 289       | 50   | 14      | optimal    | 0.046401 | 0.689352 |
| 6  | 2010_036 | 309       | 50   | 18      | gaussian   | 0.033453 | 0.712355 |
| 7  | 2010_043 | 311       | 50   | 12      | triangular | 0.035511 | 0.74211  |
| 8  | 2010_050 | 312       | 50   | 14      | triangular | 0.032108 | 0.807246 |
| 9  | 2010_057 | 314       | 50   | 14      | gaussian   | 0.032259 | 0.789468 |
| 10 | 2010_064 | 313       | 50   | 7       | triangular | 0.034287 | 0.793075 |
| 11 | 2010_071 | 314       | 50   | 13      | triangular | 0.033915 | 0.781181 |
| 12 | 2010_078 | 314       | 50   | 12      | gaussian   | 0.034845 | 0.778537 |
| 13 | 2010_085 | 313       | 50   | 13      | gaussian   | 0.033551 | 0.853531 |
| 14 | 2010_092 | 313       | 50   | 13      | triangular | 0.035666 | 0.894222 |
| 15 | 2010_099 | 313       | 50   | 13      | gaussian   | 0.032455 | 0.881955 |
| 16 | 2010_106 | 314       | 50   | 6       | gaussian   | 0.033087 | 0.597731 |
| 17 | 2010_113 | 313       | 50   | 15      | triangular | 0.032566 | 0.688552 |
| 18 | 2010_120 | 313       | 50   | 12      | triangular | 0.033301 | 0.825448 |
| 19 | 2010_127 | 314       | 50   | 9       | triangular | 0.033495 | 0.807414 |
| 20 | 2010_134 | 314       | 50   | 11      | triangular | 0.033487 | 0.688997 |
| 21 | 2010_141 | 313       | 50   | 12      | triangular | 0.032202 | 0.714525 |
| 22 | 2010_148 | 313       | 50   | 8       | triangular | 0.032294 | 0.736611 |
| 23 | 2010_155 | 314       | 50   | 15      | gaussian   | 0.031964 | 0.81092  |
| 24 | 2010_162 | 314       | 50   | 15      | optimal    | 0.034988 | 0.642114 |
| 25 | 2010_169 | 314       | 50   | 15      | gaussian   | 0.032313 | 0.75854  |
| 26 | 2010_176 | 313       | 50   | 13      | triangular | 0.032719 | 0.682974 |
| 27 | 2010_183 | 314       | 50   | 10      | triangular | 0.032866 | 0.741059 |
| 28 | 2010_190 | 313       | 50   | 12      | triangular | 0.034006 | 0.621209 |
| 29 | 2010_197 | 314       | 50   | 8       | triangular | 0.033602 | 0.710816 |
| 30 | 2010_204 | 313       | 50   | 11      | gaussian   | 0.032935 | 0.596883 |

|    |          |     |    |    |             |          |          |
|----|----------|-----|----|----|-------------|----------|----------|
| 31 | 2010_211 | 314 | 50 | 9  | triangular  | 0.030585 | 0.618225 |
| 32 | 2010_218 | 313 | 50 | 11 | gaussian    | 0.031838 | 0.5596   |
| 33 | 2010_225 | 314 | 50 | 19 | triangular  | 0.035391 | 0.513209 |
| 34 | 2010_232 | 314 | 50 | 7  | gaussian    | 0.034095 | 0.617448 |
| 35 | 2010_239 | 313 | 50 | 10 | gaussian    | 0.032726 | 0.663503 |
| 36 | 2010_246 | 313 | 50 | 6  | rank        | 0.031581 | 0.800421 |
| 37 | 2010_253 | 314 | 50 | 12 | triangular  | 0.032768 | 0.814257 |
| 38 | 2010_260 | 313 | 50 | 9  | optimal     | 0.033683 | 0.74188  |
| 39 | 2010_267 | 313 | 50 | 9  | triangular  | 0.032853 | 0.693094 |
| 40 | 2010_274 | 314 | 50 | 12 | optimal     | 0.031263 | 0.625529 |
| 41 | 2010_281 | 313 | 50 | 17 | triangular  | 0.030474 | 0.751651 |
| 42 | 2010_288 | 314 | 50 | 19 | gaussian    | 0.030446 | 0.790818 |
| 43 | 2010_295 | 313 | 50 | 10 | rectangular | 0.032593 | 0.489495 |
| 44 | 2010_302 | 313 | 50 | 14 | gaussian    | 0.030825 | 0.730025 |
| 45 | 2010_309 | 314 | 50 | 9  | gaussian    | 0.031649 | 0.733617 |
| 46 | 2010_316 | 313 | 50 | 12 | triangular  | 0.033499 | 0.640483 |
| 47 | 2010_323 | 313 | 50 | 23 | gaussian    | 0.034202 | 0.725369 |
| 48 | 2010_330 | 310 | 50 | 13 | gaussian    | 0.032871 | 0.809627 |
| 49 | 2010_337 | 308 | 50 | 16 | triangular  | 0.034715 | 0.778554 |
| 50 | 2010_344 | 298 | 50 | 29 | gaussian    | 0.034828 | 0.742494 |
| 51 | 2010_351 | 269 | 50 | 17 | gaussian    | 0.038912 | 0.619098 |
| 52 | 2010_358 | 235 | 50 | 18 | triangular  | 0.03904  | 0.736184 |

#### 4. KNN model generation outputs for weekly layers in 2010 over the West region of interest.

The **Layer** column shows the week of the year based on the first Julian day of each given week. The **No.Points** column shows the number of points used as training data in the entire sampling space in every week, this number corresponds with the 70% of the available sample points that were defined for training the model. The **kmax** column shows the maximum threshold of k-neighbors allowed to generate each model. The **Ktuned** column shows the optimal number of k-neighbors in each model derived from the highest correlation and lower RMSE obtained from a 10-fold cross validation process. The **Kernel** column shows the optimal kernel function obtained from a 10-fold cross validation process. The **rmse** and **Cor** columns show the best results of the root minimum square error and the correlation respectively, derived from a 10-fold cross validation process.

|   | Layer    | No.Points | kmax | Ktuned | Kernel       | rmse     | Cor      |
|---|----------|-----------|------|--------|--------------|----------|----------|
| 1 | 2010_001 | 82        | 50   | 5      | epanechnikov | 0.041601 | 0.71011  |
| 2 | 2010_008 | 92        | 50   | 5      | gaussian     | 0.041825 | 0.641207 |
| 3 | 2010_015 | 134       | 50   | 8      | rectangular  | 0.043103 | 0.477662 |
| 4 | 2010_022 | 110       | 50   | 7      | gaussian     | 0.037851 | 0.712641 |
| 5 | 2010_029 | 79        | 50   | 9      | triangular   | 0.044873 | 0.499388 |
| 6 | 2010_036 | 163       | 50   | 3      | rectangular  | 0.042025 | 0.525727 |

|    |          |     |    |    |              |          |          |
|----|----------|-----|----|----|--------------|----------|----------|
| 7  | 2010_043 | 112 | 50 | 7  | rectangular  | 0.041076 | 0.513411 |
| 8  | 2010_050 | 125 | 50 | 6  | gaussian     | 0.037012 | 0.614376 |
| 9  | 2010_057 | 118 | 50 | 6  | triangular   | 0.037202 | 0.785318 |
| 10 | 2010_064 | 144 | 50 | 9  | triangular   | 0.033926 | 0.663868 |
| 11 | 2010_071 | 116 | 50 | 4  | rank         | 0.038606 | 0.778592 |
| 12 | 2010_078 | 98  | 50 | 29 | gaussian     | 0.044117 | 0.509771 |
| 13 | 2010_085 | 112 | 50 | 12 | triangular   | 0.038498 | 0.544737 |
| 14 | 2010_092 | 136 | 50 | 11 | triangular   | 0.041993 | 0.646883 |
| 15 | 2010_099 | 139 | 50 | 11 | triangular   | 0.038531 | 0.655275 |
| 16 | 2010_106 | 213 | 50 | 14 | optimal      | 0.042966 | 0.635265 |
| 17 | 2010_113 | 245 | 50 | 6  | triangular   | 0.038932 | 0.660737 |
| 18 | 2010_120 | 185 | 50 | 11 | triangular   | 0.039207 | 0.527385 |
| 19 | 2010_127 | 212 | 50 | 12 | triangular   | 0.035879 | 0.659577 |
| 20 | 2010_134 | 271 | 50 | 17 | gaussian     | 0.031118 | 0.578591 |
| 21 | 2010_141 | 232 | 50 | 6  | rank         | 0.039611 | 0.621008 |
| 22 | 2010_148 | 263 | 50 | 8  | rectangular  | 0.032489 | 0.677565 |
| 23 | 2010_155 | 282 | 50 | 16 | rectangular  | 0.035451 | 0.523236 |
| 24 | 2010_162 | 277 | 50 | 18 | gaussian     | 0.032029 | 0.511819 |
| 25 | 2010_169 | 183 | 50 | 25 | gaussian     | 0.031265 | 0.316594 |
| 26 | 2010_176 | 224 | 50 | 45 | gaussian     | 0.030587 | 0.405565 |
| 27 | 2010_183 | 213 | 50 | 17 | gaussian     | 0.027988 | 0.436465 |
| 28 | 2010_190 | 228 | 50 | 18 | rectangular  | 0.028274 | 0.2438   |
| 29 | 2010_197 | 273 | 50 | 32 | gaussian     | 0.028025 | 0.329735 |
| 30 | 2010_204 | 266 | 50 | 9  | gaussian     | 0.030123 | 0.683509 |
| 31 | 2010_211 | 250 | 50 | 8  | gaussian     | 0.027597 | 0.591473 |
| 32 | 2010_218 | 226 | 50 | 9  | rectangular  | 0.027893 | 0.619235 |
| 33 | 2010_225 | 230 | 50 | 24 | gaussian     | 0.029999 | 0.526258 |
| 34 | 2010_232 | 235 | 50 | 8  | gaussian     | 0.025714 | 0.600546 |
| 35 | 2010_239 | 283 | 50 | 41 | gaussian     | 0.026607 | 0.427075 |
| 36 | 2010_246 | 244 | 50 | 18 | triangular   | 0.029593 | 0.592949 |
| 37 | 2010_253 | 232 | 50 | 12 | gaussian     | 0.026128 | 0.452776 |
| 38 | 2010_260 | 233 | 50 | 13 | gaussian     | 0.027583 | 0.338615 |
| 39 | 2010_267 | 225 | 50 | 16 | optimal      | 0.028581 | 0.442803 |
| 40 | 2010_274 | 310 | 50 | 11 | epanechnikov | 0.030875 | 0.627412 |
| 41 | 2010_281 | 308 | 50 | 8  | gaussian     | 0.030789 | 0.734699 |
| 42 | 2010_288 | 310 | 50 | 6  | triangular   | 0.032596 | 0.63296  |
| 43 | 2010_295 | 310 | 50 | 11 | gaussian     | 0.032182 | 0.538848 |
| 44 | 2010_302 | 295 | 50 | 12 | rectangular  | 0.033158 | 0.617948 |
| 45 | 2010_309 | 296 | 50 | 8  | gaussian     | 0.034256 | 0.544957 |
| 46 | 2010_316 | 243 | 50 | 15 | triangular   | 0.034164 | 0.59176  |
| 47 | 2010_323 | 203 | 50 | 10 | triangular   | 0.039842 | 0.735292 |

|    |          |     |    |    |             |          |          |
|----|----------|-----|----|----|-------------|----------|----------|
| 48 | 2010_330 | 161 | 50 | 11 | triangular  | 0.04244  | 0.628606 |
| 49 | 2010_337 | 179 | 50 | 49 | gaussian    | 0.055432 | 0.414545 |
| 50 | 2010_344 | 171 | 50 | 8  | triangular  | 0.032141 | 0.776669 |
| 51 | 2010_351 | 207 | 50 | 9  | gaussian    | 0.037175 | 0.392222 |
| 52 | 2010_358 | 168 | 50 | 6  | rectangular | 0.042378 | 0.543952 |

##### 5. Random Forest model generation outputs for monthly layers in 2010 over the Midwest region of interest.

The **Layer** column shows the month of the year. The **No.Points** column shows the number of points used as training data in the entire sampling space in every month, this number corresponds with the 70% of the available sample points that were defined for training the model. The **Best\_Mtry** column shows the number of covariates defined in the model in relation to the number of predictors used as input (6 predictors for this study: latitude, longitude, elevation, aspect, slope and topographic wetness index). The **Trees** column shows the maximum number of trees allows in the model generation. The **rmse** and **Cor** columns show the best results of the root minimum square error and the correlation respectively, derived from a cross validation process.

|    | Layer   | No.Points | Best_Mtry | Trees | rmse     | Cor      |
|----|---------|-----------|-----------|-------|----------|----------|
| 1  | 2010_01 | 312       | 4         | 500   | 0.029525 | 0.874631 |
| 2  | 2010_02 | 314       | 2         | 500   | 0.032544 | 0.790907 |
| 3  | 2010_03 | 314       | 2         | 500   | 0.032361 | 0.825387 |
| 4  | 2010_04 | 314       | 4         | 500   | 0.028056 | 0.856964 |
| 5  | 2010_05 | 314       | 6         | 500   | 0.030829 | 0.792975 |
| 6  | 2010_06 | 314       | 6         | 500   | 0.030191 | 0.785509 |
| 7  | 2010_07 | 314       | 4         | 500   | 0.032083 | 0.679189 |
| 8  | 2010_08 | 314       | 4         | 500   | 0.028708 | 0.661906 |
| 9  | 2010_09 | 314       | 4         | 500   | 0.029513 | 0.798924 |
| 10 | 2010_10 | 314       | 2         | 500   | 0.027911 | 0.716726 |
| 11 | 2010_11 | 314       | 4         | 500   | 0.029857 | 0.772466 |
| 12 | 2010_12 | 313       | 4         | 500   | 0.030687 | 0.797773 |

##### 6. Random Forest model generation outputs for monthly layers in 2010 over the West region of interest.

The **Layer** column shows the month of the year. The **No.Points** column shows the number of points used as training data in the entire sampling space in every month, this number corresponds with the 70% of the available sample points that were defined for training the model. The **Best\_Mtry** column shows the number of covariates defined in the model in relation to the number of predictors used as input (6 predictors for this study: latitude, longitude, elevation, aspect, slope and topographic wetness index). The **Trees** column shows the maximum number of trees allows in the model generation. The **rmse** and **Cor** columns show the best results of the root minimum square error and the correlation respectively, derived from a cross validation process.

|    | Layer   | No.Points | Best_Mtry | Trees | rmse     | Cor      |
|----|---------|-----------|-----------|-------|----------|----------|
| 1  | 2010_01 | 147       | 2         | 500   | 0.040574 | 0.578781 |
| 2  | 2010_02 | 170       | 4         | 500   | 0.042011 | 0.511476 |
| 3  | 2010_03 | 165       | 6         | 500   | 0.037014 | 0.613663 |
| 4  | 2010_04 | 254       | 4         | 500   | 0.037013 | 0.677767 |
| 5  | 2010_05 | 279       | 6         | 500   | 0.031245 | 0.64261  |
| 6  | 2010_06 | 306       | 6         | 500   | 0.024996 | 0.628001 |
| 7  | 2010_07 | 301       | 4         | 500   | 0.023169 | 0.689071 |
| 8  | 2010_08 | 299       | 6         | 500   | 0.023592 | 0.649491 |
| 9  | 2010_09 | 275       | 2         | 500   | 0.023059 | 0.602698 |
| 10 | 2010_10 | 311       | 6         | 500   | 0.025625 | 0.726276 |
| 11 | 2010_11 | 307       | 6         | 500   | 0.0308   | 0.658046 |
| 12 | 2010_12 | 249       | 2         | 500   | 0.044703 | 0.464744 |

#### 7. Random Forest model generation outputs for weekly layers in 2010 over the Midwest region of interest.

The **Layer** column shows the week of the year based on the first Julian day of each given week. The **No.Points** column shows the number of points used as training data in the entire sampling space in every week, this number corresponds with the 70% of the available sample points that were defined for training the model. The **Best\_Mtry** column shows the number of covariates defined in the model in relation to the number of predictors used as input (6 predictors for this study: latitude, longitude, elevation, aspect, slope and topographic wetness index). The **Trees** column shows the maximum number of trees allows in the model generation. The **rmse** and **Cor** columns show the best results of the root minimum square error and the correlation respectively, derived from a cross validation process.

|    | Layer    | No.Points | Best_Mtry | Trees | rmse     | Cor      |
|----|----------|-----------|-----------|-------|----------|----------|
| 1  | 2010_001 | 259       | 2         | 500   | 0.035672 | 0.812821 |
| 2  | 2010_008 | 269       | 6         | 500   | 0.03306  | 0.821776 |
| 3  | 2010_015 | 309       | 4         | 500   | 0.031652 | 0.880383 |
| 4  | 2010_022 | 308       | 4         | 500   | 0.032526 | 0.862134 |
| 5  | 2010_029 | 289       | 2         | 500   | 0.043124 | 0.749933 |
| 6  | 2010_036 | 309       | 6         | 500   | 0.031207 | 0.755711 |
| 7  | 2010_043 | 311       | 4         | 500   | 0.031438 | 0.818046 |
| 8  | 2010_050 | 312       | 2         | 500   | 0.030511 | 0.827833 |
| 9  | 2010_057 | 314       | 2         | 500   | 0.031575 | 0.809027 |
| 10 | 2010_064 | 313       | 2         | 500   | 0.0326   | 0.824501 |
| 11 | 2010_071 | 314       | 4         | 500   | 0.031257 | 0.824936 |
| 12 | 2010_078 | 314       | 2         | 500   | 0.032426 | 0.815981 |
| 13 | 2010_085 | 313       | 4         | 500   | 0.030963 | 0.880842 |
| 14 | 2010_092 | 313       | 2         | 500   | 0.03182  | 0.91929  |
| 15 | 2010_099 | 313       | 4         | 500   | 0.027513 | 0.917342 |

|    |          |     |   |     |          |          |
|----|----------|-----|---|-----|----------|----------|
| 16 | 2010_106 | 314 | 4 | 500 | 0.031687 | 0.649904 |
| 17 | 2010_113 | 313 | 4 | 500 | 0.03021  | 0.73991  |
| 18 | 2010_120 | 313 | 4 | 500 | 0.030687 | 0.856312 |
| 19 | 2010_127 | 314 | 4 | 500 | 0.030894 | 0.839125 |
| 20 | 2010_134 | 314 | 4 | 500 | 0.030755 | 0.750848 |
| 21 | 2010_141 | 313 | 2 | 500 | 0.030384 | 0.755212 |
| 22 | 2010_148 | 313 | 4 | 500 | 0.030674 | 0.776    |
| 23 | 2010_155 | 314 | 4 | 500 | 0.029479 | 0.844907 |
| 24 | 2010_162 | 314 | 4 | 500 | 0.031882 | 0.712714 |
| 25 | 2010_169 | 314 | 4 | 500 | 0.029571 | 0.814024 |
| 26 | 2010_176 | 313 | 4 | 500 | 0.02988  | 0.753661 |
| 27 | 2010_183 | 314 | 4 | 500 | 0.031329 | 0.760456 |
| 28 | 2010_190 | 313 | 4 | 500 | 0.030539 | 0.711995 |
| 29 | 2010_197 | 314 | 4 | 500 | 0.031376 | 0.763778 |
| 30 | 2010_204 | 313 | 2 | 500 | 0.03181  | 0.642023 |
| 31 | 2010_211 | 314 | 2 | 500 | 0.02905  | 0.675296 |
| 32 | 2010_218 | 313 | 2 | 500 | 0.030918 | 0.60397  |
| 33 | 2010_225 | 314 | 6 | 500 | 0.032493 | 0.621609 |
| 34 | 2010_232 | 314 | 6 | 500 | 0.031984 | 0.674627 |
| 35 | 2010_239 | 313 | 4 | 500 | 0.030664 | 0.715705 |
| 36 | 2010_246 | 313 | 4 | 500 | 0.032339 | 0.79463  |
| 37 | 2010_253 | 314 | 4 | 500 | 0.031788 | 0.831324 |
| 38 | 2010_260 | 313 | 6 | 500 | 0.031677 | 0.777231 |
| 39 | 2010_267 | 313 | 4 | 500 | 0.029879 | 0.756672 |
| 40 | 2010_274 | 314 | 4 | 500 | 0.029563 | 0.685711 |
| 41 | 2010_281 | 313 | 4 | 500 | 0.029012 | 0.786787 |
| 42 | 2010_288 | 314 | 2 | 500 | 0.028851 | 0.825059 |
| 43 | 2010_295 | 313 | 2 | 500 | 0.032469 | 0.536958 |
| 44 | 2010_302 | 313 | 6 | 500 | 0.029008 | 0.770491 |
| 45 | 2010_309 | 314 | 4 | 500 | 0.029448 | 0.781915 |
| 46 | 2010_316 | 313 | 4 | 500 | 0.032048 | 0.682287 |
| 47 | 2010_323 | 313 | 6 | 500 | 0.032005 | 0.76434  |
| 48 | 2010_330 | 310 | 2 | 500 | 0.030399 | 0.844596 |
| 49 | 2010_337 | 308 | 4 | 500 | 0.032859 | 0.805868 |
| 50 | 2010_344 | 298 | 2 | 500 | 0.031482 | 0.78782  |
| 51 | 2010_351 | 269 | 2 | 500 | 0.035504 | 0.706698 |
| 52 | 2010_358 | 235 | 2 | 500 | 0.035822 | 0.805875 |



# **8. Random Forest model generation outputs for weekly layers in 2010 over the West region of interest.**

The **Layer** column shows the week of the year based on the first Julian day of each given week. The **No.Points** column shows the number of points used as training data in the entire sampling space in every week, this number corresponds with the 70% of the available sample points that were defined for training the model. The **Best\_Mtry** column shows the number of covariates defined in the model in relation to the number of predictors used as input (6 predictors for this study: latitude, longitude, elevation, aspect, slope and topographic wetness index). The **Trees** column shows the maximum number of trees allows in the model generation. The **rmse** and **Cor** columns show the best results of the root minimum square error and the correlation respectively, derived from a cross validation process.

|    | Layer    | No.Points | Best_Mtry | Trees | rmse     | Cor      |
|----|----------|-----------|-----------|-------|----------|----------|
| 1  | 2010_001 | 82        | 4         | 500   | 0.04054  | 0.75674  |
| 2  | 2010_008 | 92        | 2         | 500   | 0.042483 | 0.652301 |
| 3  | 2010_015 | 134       | 4         | 500   | 0.041288 | 0.579426 |
| 4  | 2010_022 | 110       | 4         | 500   | 0.035949 | 0.773238 |
| 5  | 2010_029 | 79        | 4         | 500   | 0.040783 | 0.651056 |
| 6  | 2010_036 | 163       | 6         | 500   | 0.039855 | 0.595294 |
| 7  | 2010_043 | 112       | 4         | 500   | 0.040229 | 0.583188 |
| 8  | 2010_050 | 125       | 6         | 500   | 0.034191 | 0.695344 |
| 9  | 2010_057 | 118       | 4         | 500   | 0.035009 | 0.83284  |
| 10 | 2010_064 | 144       | 6         | 500   | 0.033577 | 0.666503 |
| 11 | 2010_071 | 116       | 4         | 500   | 0.041735 | 0.759273 |
| 12 | 2010_078 | 98        | 6         | 500   | 0.037456 | 0.740395 |
| 13 | 2010_085 | 112       | 6         | 500   | 0.035803 | 0.639456 |
| 14 | 2010_092 | 136       | 6         | 500   | 0.036887 | 0.795528 |
| 15 | 2010_099 | 139       | 2         | 500   | 0.037609 | 0.716505 |
| 16 | 2010_106 | 213       | 6         | 500   | 0.032693 | 0.814863 |
| 17 | 2010_113 | 245       | 6         | 500   | 0.034536 | 0.745326 |
| 18 | 2010_120 | 185       | 6         | 500   | 0.035367 | 0.635394 |
| 19 | 2010_127 | 212       | 6         | 500   | 0.034217 | 0.715174 |
| 20 | 2010_134 | 271       | 6         | 500   | 0.027533 | 0.692708 |
| 21 | 2010_141 | 232       | 6         | 500   | 0.034268 | 0.747985 |
| 22 | 2010_148 | 263       | 6         | 500   | 0.028933 | 0.757469 |
| 23 | 2010_155 | 282       | 4         | 500   | 0.033341 | 0.609875 |
| 24 | 2010_162 | 277       | 6         | 500   | 0.028214 | 0.664735 |
| 25 | 2010_169 | 183       | 2         | 500   | 0.030446 | 0.420546 |
| 26 | 2010_176 | 224       | 2         | 500   | 0.02964  | 0.487509 |
| 27 | 2010_183 | 213       | 2         | 500   | 0.027293 | 0.504962 |
| 28 | 2010_190 | 228       | 2         | 500   | 0.028027 | 0.412982 |
| 29 | 2010_197 | 273       | 4         | 500   | 0.026891 | 0.459981 |
| 30 | 2010_204 | 266       | 6         | 500   | 0.02732  | 0.757963 |

|    |          |     |   |     |          |          |
|----|----------|-----|---|-----|----------|----------|
| 31 | 2010_211 | 250 | 4 | 500 | 0.025885 | 0.661996 |
| 32 | 2010_218 | 226 | 6 | 500 | 0.025321 | 0.712892 |
| 33 | 2010_225 | 230 | 4 | 500 | 0.028122 | 0.625634 |
| 34 | 2010_232 | 235 | 6 | 500 | 0.024251 | 0.655923 |
| 35 | 2010_239 | 283 | 6 | 500 | 0.024632 | 0.557175 |
| 36 | 2010_246 | 244 | 4 | 500 | 0.027099 | 0.68102  |
| 37 | 2010_253 | 232 | 4 | 500 | 0.02417  | 0.583953 |
| 38 | 2010_260 | 233 | 6 | 500 | 0.026441 | 0.437835 |
| 39 | 2010_267 | 225 | 4 | 500 | 0.027502 | 0.510778 |
| 40 | 2010_274 | 310 | 6 | 500 | 0.028572 | 0.692174 |
| 41 | 2010_281 | 308 | 6 | 500 | 0.027651 | 0.794839 |
| 42 | 2010_288 | 310 | 4 | 500 | 0.030202 | 0.685371 |
| 43 | 2010_295 | 310 | 2 | 500 | 0.031837 | 0.563831 |
| 44 | 2010_302 | 295 | 2 | 500 | 0.032907 | 0.640327 |
| 45 | 2010_309 | 296 | 6 | 500 | 0.033913 | 0.576586 |
| 46 | 2010_316 | 243 | 4 | 500 | 0.031364 | 0.676599 |
| 47 | 2010_323 | 203 | 4 | 500 | 0.036792 | 0.781788 |
| 48 | 2010_330 | 161 | 6 | 500 | 0.040691 | 0.685306 |
| 49 | 2010_337 | 179 | 4 | 500 | 0.047305 | 0.628554 |
| 50 | 2010_344 | 171 | 6 | 500 | 0.02946  | 0.825084 |
| 51 | 2010_351 | 207 | 4 | 500 | 0.037134 | 0.439452 |
| 52 | 2010_358 | 168 | 4 | 500 | 0.041899 | 0.563108 |
